# Supplementary material for: Structural characterization and anti-osteoporosis activity of two polysaccharides extracted from the rhizome of Curculigo orchioides
Source: Royal Society of Chemistry journal article supplement (doi:10.1039/d2fo00720g), 2022-01-01
Supplement: d2fo00720g1.pdf [file d2fo00720g1.pdf]

## **Supplementary data**

**Structural characterization and anti-osteoporosis activity of two polysaccharides from the rhizome of *Curculigo orchioides***

## Supplementary Tables

**Table S1**

The elution program of HPLC.

| Time (min) | A% | B% | C% |
|------------|----|----|----|
| 0          | 0  | 17 | 83 |
| 24         | 0  | 17 | 83 |
| 25         | 0  | 19 | 81 |
| 30         | 0  | 18 | 82 |
| 31         | 5  | 14 | 81 |
| 32         | 5  | 14 | 81 |
| 33         | 0  | 18 | 82 |
| 34         | 5  | 14 | 81 |
| 36         | 0  | 18 | 82 |

A: ultrapure water

B: acetonitrile

C: 0.05 M phosphate buffer solution (pH 6.7)

**Table S2**

Static parameters of proximal tibia metaphysis.

| <b>Group</b> | <b>Tb.Ar</b><br>%              | <b>Tb.Th</b><br>$\mu\text{m}$        | <b>Tb.N</b><br>mm             | <b>Tb.Sp</b><br>$\mu\text{m}$          |
|--------------|--------------------------------|--------------------------------------|-------------------------------|----------------------------------------|
| Sham         | 25.43 $\pm$ 1.09               | 33775.52 $\pm$ 1672.69               | 7.53 $\pm$ 0.19               | 99042.21 $\pm$ 2892.40                 |
| OVX          | 6.62 $\pm$ 0.03 <sup>##</sup>  | 33744.45 $\pm$ 968.78                | 1.96 $\pm$ 0.06 <sup>##</sup> | 475835.55 $\pm$ 14803.72 <sup>##</sup> |
| E2           | 16.71 $\pm$ 0.13 <sup>**</sup> | 39008.64 $\pm$ 1343.73 <sup>**</sup> | 4.29 $\pm$ 0.17 <sup>**</sup> | 194433.24 $\pm$ 7513.15 <sup>**</sup>  |
| CO50         | 16.94 $\pm$ 0.65 <sup>**</sup> | 42674.52 $\pm$ 483.83 <sup>**</sup>  | 3.97 $\pm$ 0.18 <sup>**</sup> | 209520.56 $\pm$ 10915.22 <sup>**</sup> |

Values are expressed as mean  $\pm$  SD. <sup>##</sup>  $P < 0.01$  vs. Sham; <sup>\*\*</sup>  $P < 0.01$  vs. OVX.

**Table S3**

GC-MS analysis of COP50-1.

| <b>t<sub>R</sub></b><br><b>(min)</b> | <b>PMAA</b>                                                           | <b>Type of<br/>linkage</b> | <b>Relative<br/>Molar ratio</b> | <b>Mass fragments<br/>(m/z)</b>                         |
|--------------------------------------|-----------------------------------------------------------------------|----------------------------|---------------------------------|---------------------------------------------------------|
| 15.76                                | 1,5-di- <i>O</i> -acetyl-2,3,4,6-tetra- <i>O</i> -methyl-D-glucitol   | D-Glcp-(1→                 | 4.5                             | 43,59,71,87,101,117,<br>129,145,161,205                 |
| 16.21                                | 1,5-di- <i>O</i> -acetyl-2,3,4,6-tetra- <i>O</i> -methyl-D-galactitol | D-Galp-(1→                 | 2.2                             | 43,59,71,87,101,117,<br>129,145,161,205                 |
| 18.34                                | 1,4,5-tri- <i>O</i> -acetyl-2,3,6-tri- <i>O</i> -methyl-D-glucitol    | →4)-D-Glcp-(1→             | 6.1                             | 43,57,71,87,99,117,<br>129,143,159,173,187,<br>203,233  |
| 19.24                                | 1,3,4,5-tetra- <i>O</i> -acetyl-2,6-di- <i>O</i> -methyl-D-glucitol   | →3,4)-D-Glcp-(1→           | 2.2                             | 43,59,75,87,117,129,<br>143,161,185,203,233,<br>305     |
| 20.05                                | 1,4,5,6-tetra- <i>O</i> -acetyl-2,3-di- <i>O</i> -methyl-D-glucitol   | →4,6)-D-Glcp-(1→           | 2.1                             | 43,57,75,85,101,117,<br>127,143,171,187,201,<br>231,261 |
| 20.18                                | 1,4,5,6-tetra- <i>O</i> -acetyl-2,3-di- <i>O</i> -methyl-D-mannitol   | →4,6)-D-Manp-(1→           | 1.0                             | 43,57,75,85,101,117,<br>127,141,171,187,201,<br>231,261 |

**Table S4**<sup>1</sup>H and <sup>13</sup>C NMR chemical shifts of COP50-1.

| Glycosyl residue            | H1    | H2   | H3   | H4   | H5   | H6        |
|-----------------------------|-------|------|------|------|------|-----------|
|                             | C1    | C2   | C3   | C4   | C5   | C6        |
| →4)- $\alpha$ -D-Glcp-(1→   | 5.33  | 3.78 | 3.66 | 3.77 | 3.53 | 3.55/3.57 |
| Residue A                   | 99.5  | 72.8 | 75.1 | 76.9 | 73.7 | 60.7      |
| $\alpha$ -D-Glcp-(1→        | 5.32  | 3.76 | 3.69 | 3.55 | 3.57 | 3.52/3.53 |
| Residue B                   | 96.6  | 71.7 | 75.9 | 71.4 | 73.1 | 60.3      |
| →3,4)- $\alpha$ -D-Glcp-(1→ | 4.57  | 3.70 | 4.07 | 3.72 | 3.59 | 3.59/3.60 |
| Residue D                   | 95.7  | 72.9 | 78.8 | 76.1 | 73.0 | 62.5      |
| →4,6)- $\alpha$ -D-Glcp-(1→ | 4.90  | 3.77 | 3.65 | 3.71 | 3.61 | 3.76/3.78 |
| Residue E                   | 98.3  | 73.2 | 76.1 | 77.3 | 72.7 | 69.3      |
| $\beta$ -D-Galp-(1→         | 4.56  | 3.88 | 3.56 | 3.71 | 3.67 | 3.34/3.36 |
| Residue F                   | 104.2 | 72.8 | 74.2 | 71.1 | 74.5 | 60.9      |
| →4,6)- $\beta$ -D-Manp-(1→  | 4.45  | 3.68 | 3.73 | 3.86 | 3.64 | 3.69/3.70 |
| Residue G                   | 102.6 | 72.9 | 73.4 | 76.0 | 74.5 | 69.4      |

## Supplementary Figs

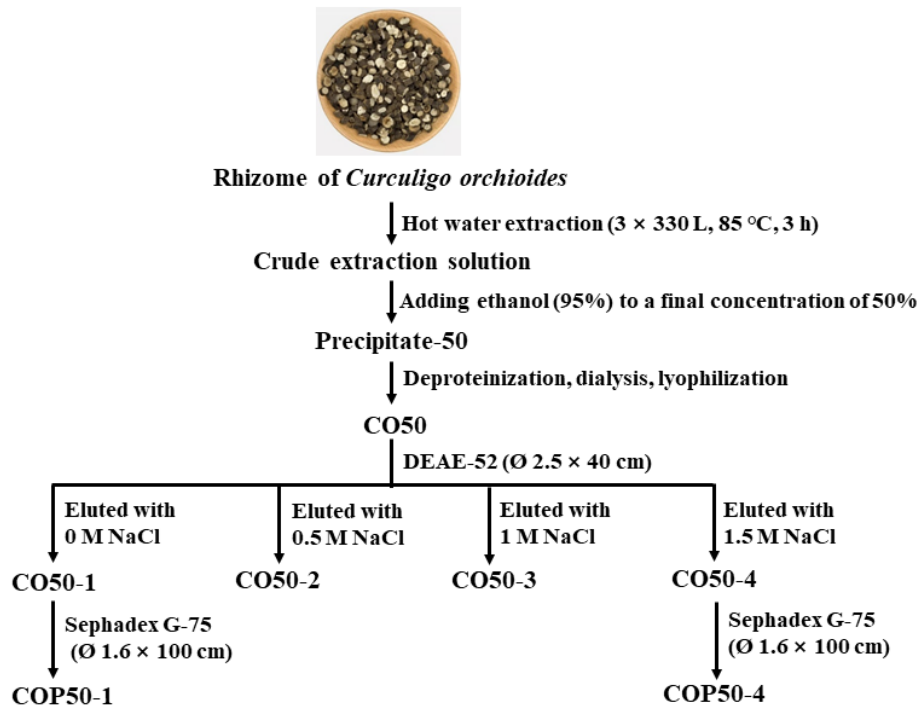

**Fig. S1** The flow diagram for the isolation and purification of polysaccharides from *Curculigo orchioides*.

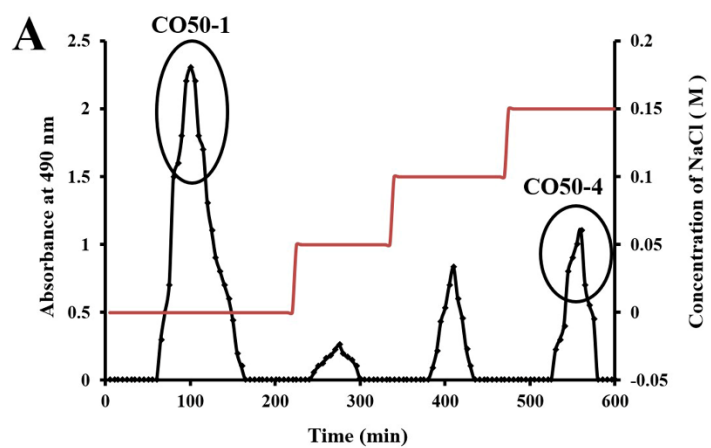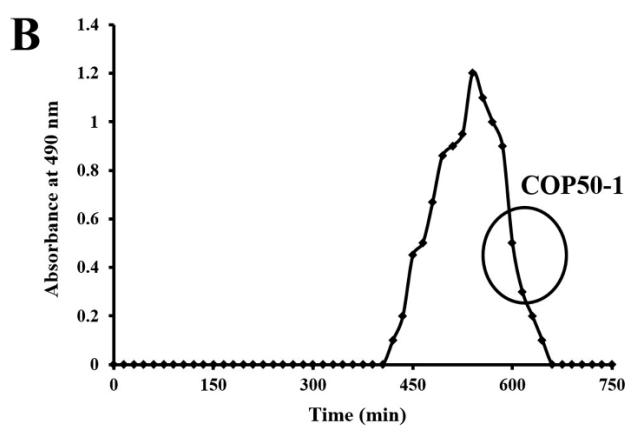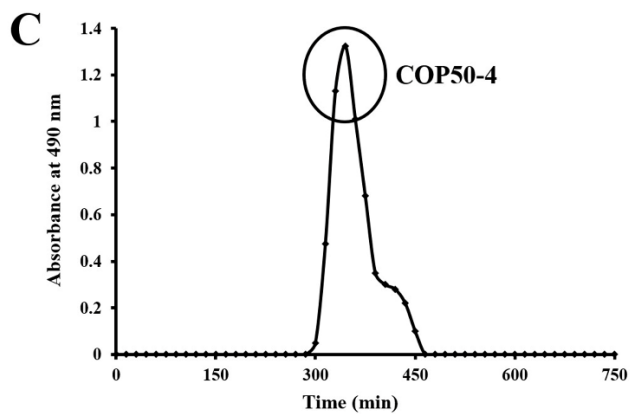

**Fig. S2** (A) Elution profile of CO50 on DEAE-cellulose 52 column. Elution profile of CO50-1(B) and CO50-4 (C) on Sephadex G-75 column.

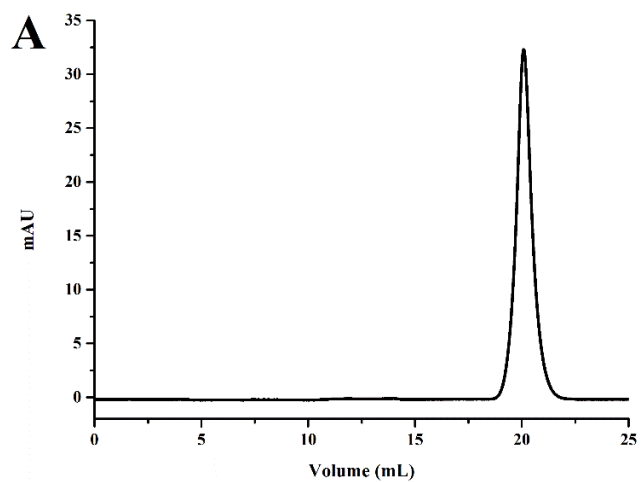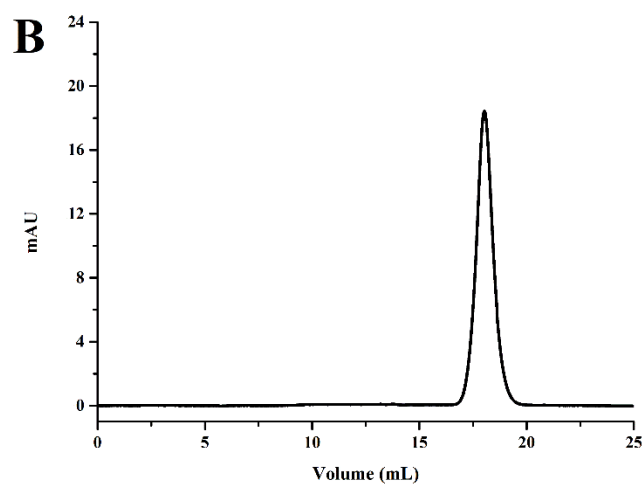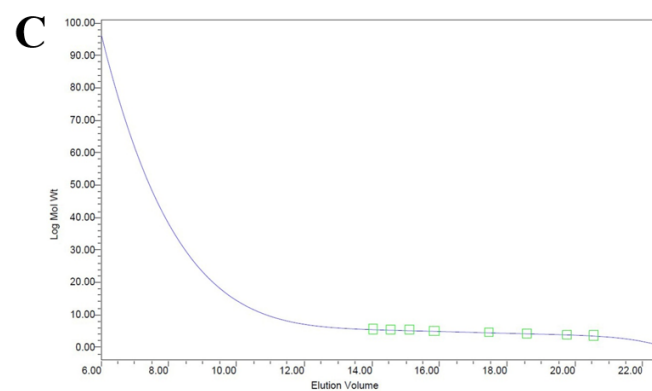

**Fig. S3** The HPGPC chromatogram of COP50-1 (A) and COP50-4 (B). (C) The calibration curve of HPGPC.



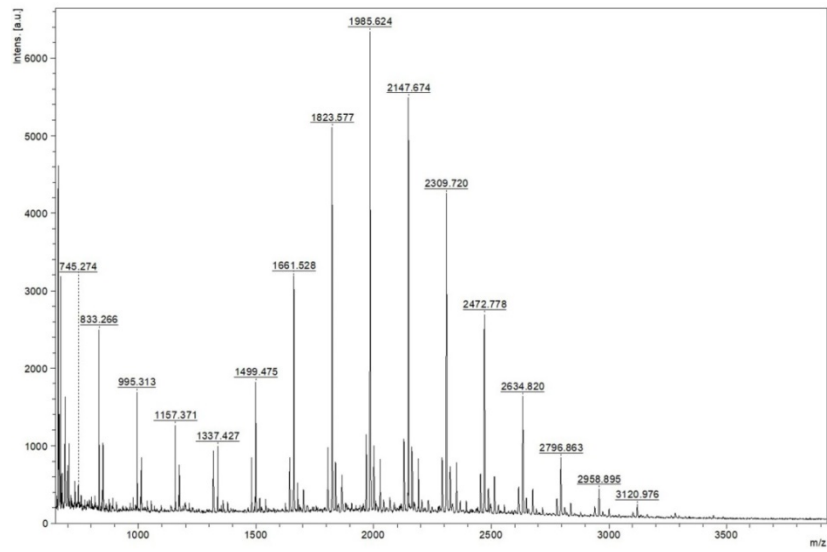

**Fig. S4** The MALDI-TOF-MS spectrum of COP50-1 in 500-4000 Da.

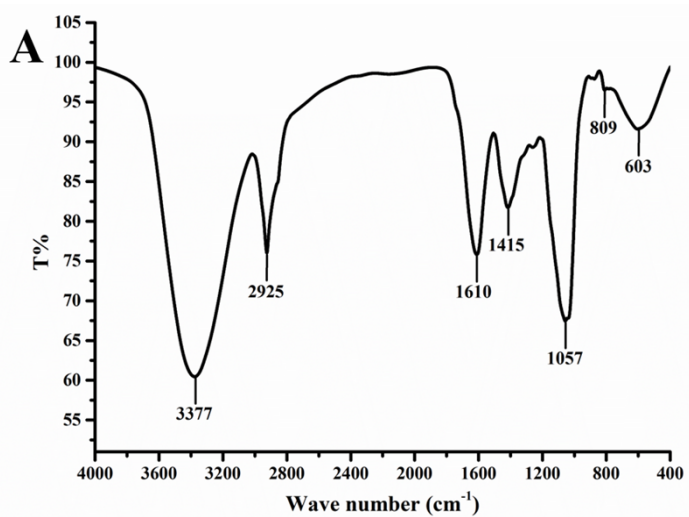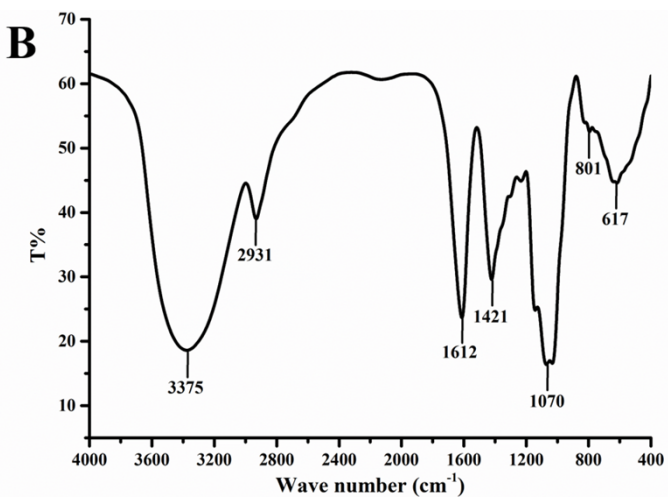

**Fig. S5** FT-IR spectra of COP50-1 (A) and COP50-4 (B).

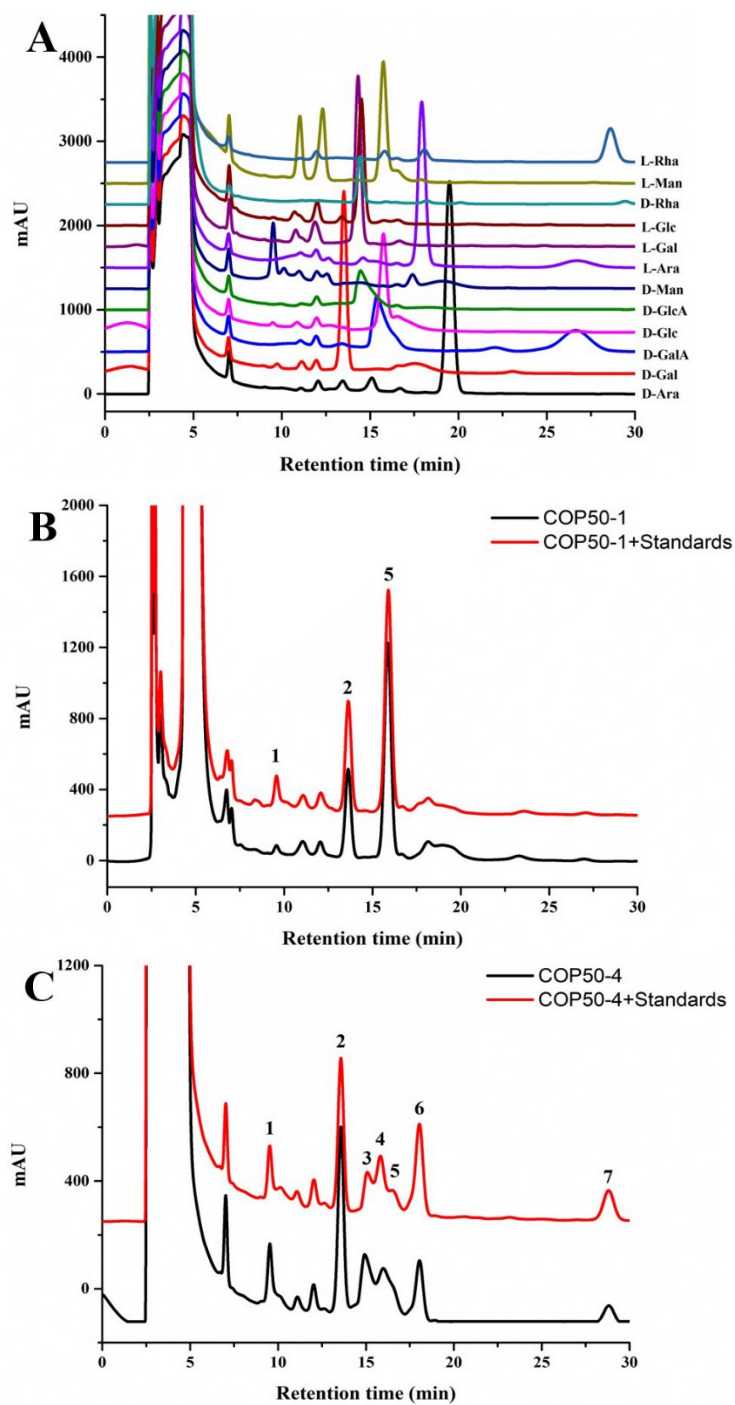

**Fig. S6** HPLC chromatograms of (A) derivatives of standard monosaccharides, (B) COP50-1 derivatives and COP50-1 derivatives mixed with D-mannose, D-galactose, D-glucose and (C) COP50-4 derivatives and COP50-4 derivatives mixed with D-mannose, D-galactose, D-glucuronic acid, D-galacturonic acid, D-glucose, L-arabinose, L-rhamnose.

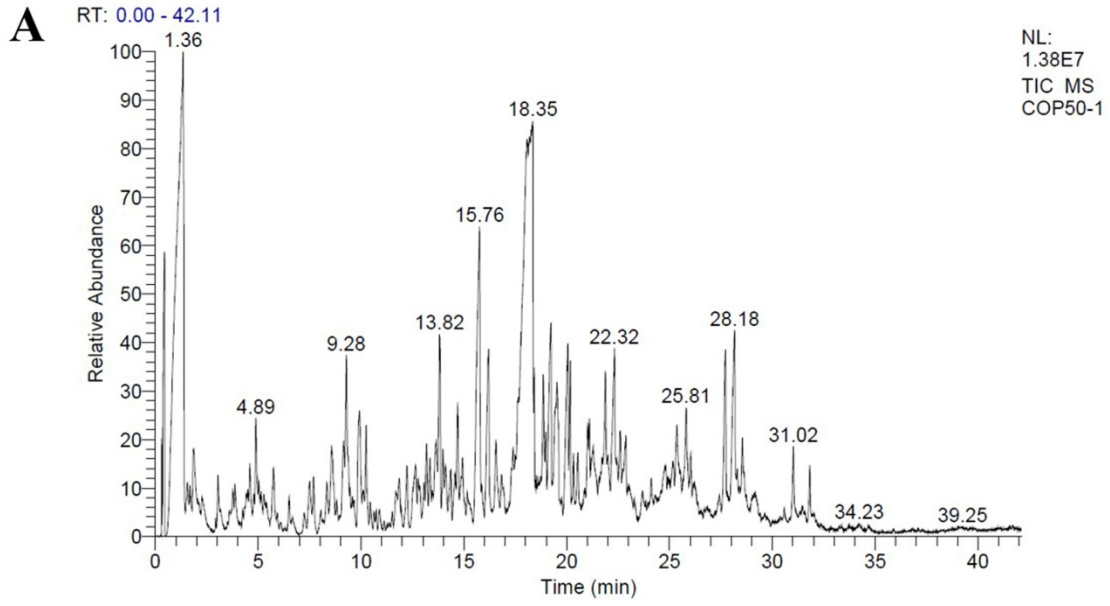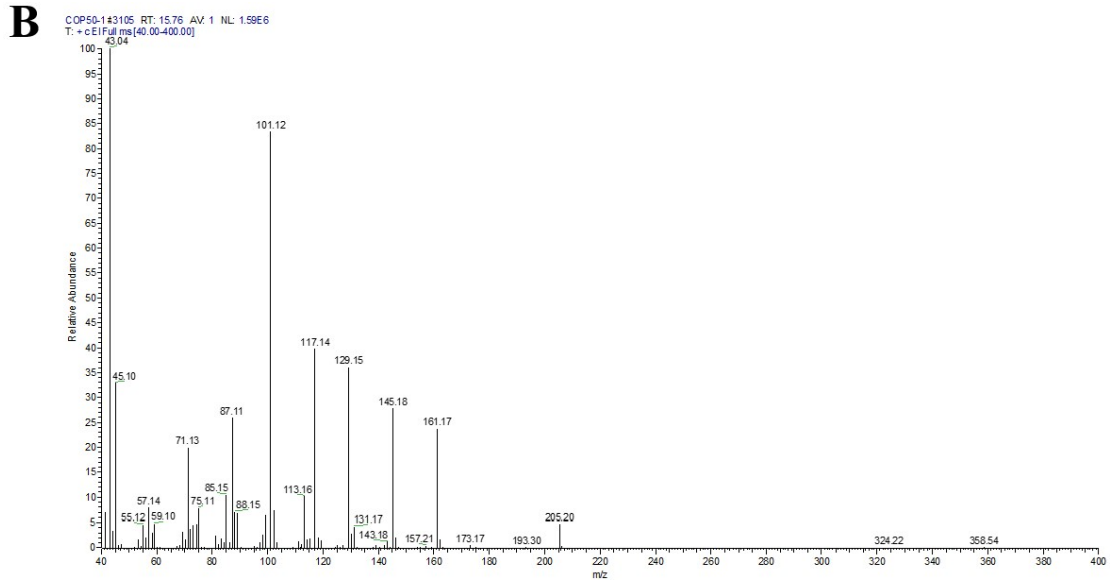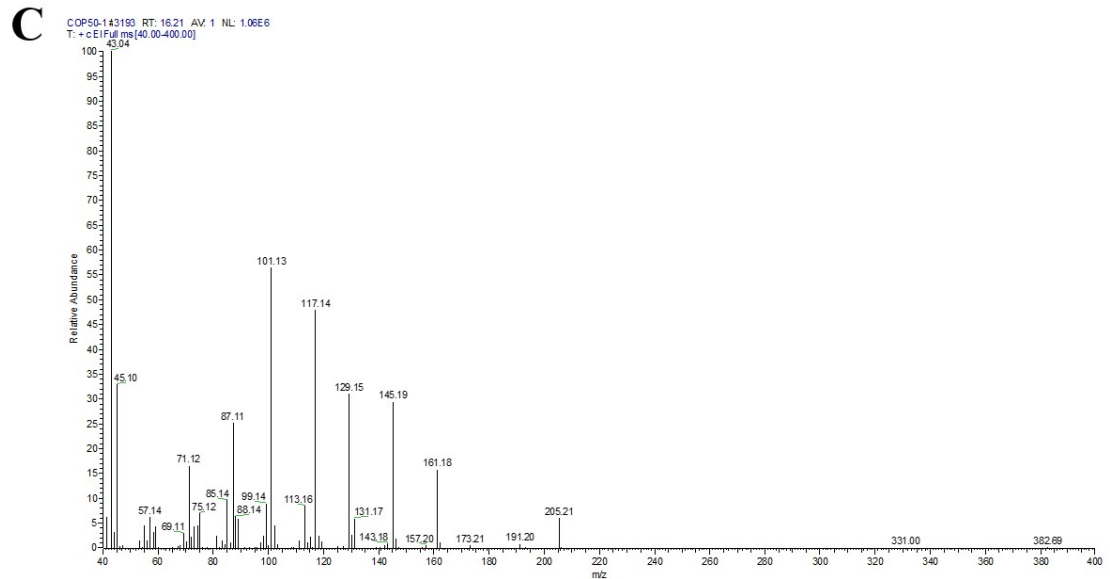

**D**COP50-143814 RT: 18.34 AV: 1 NL: 2.55E6  
T: -cEiFull.ms[40.00-400.00]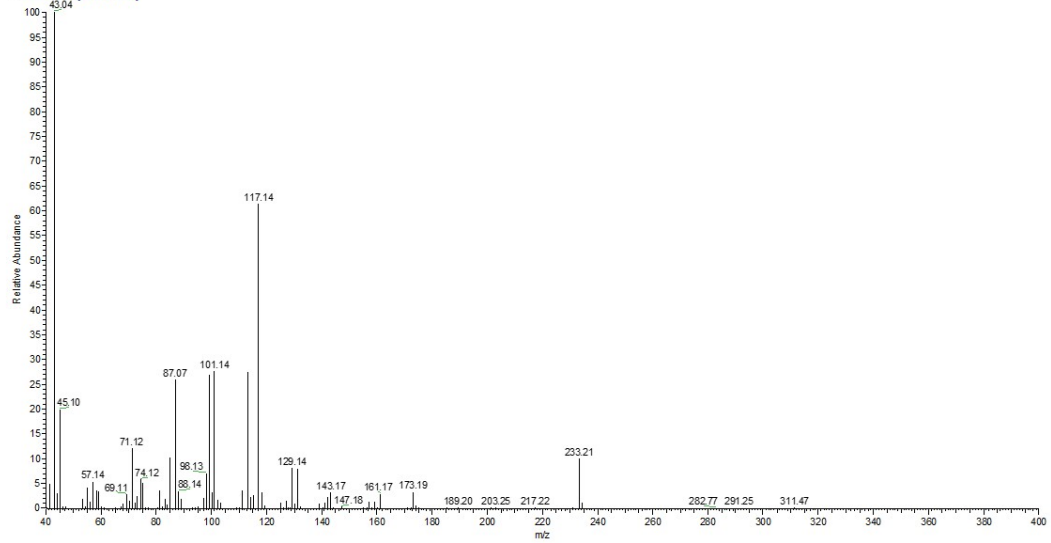**E**COP50-143790 RT: 19.24 AV: 1 NL: 1.43E6  
T: -cEiFull.ms[40.00-400.00]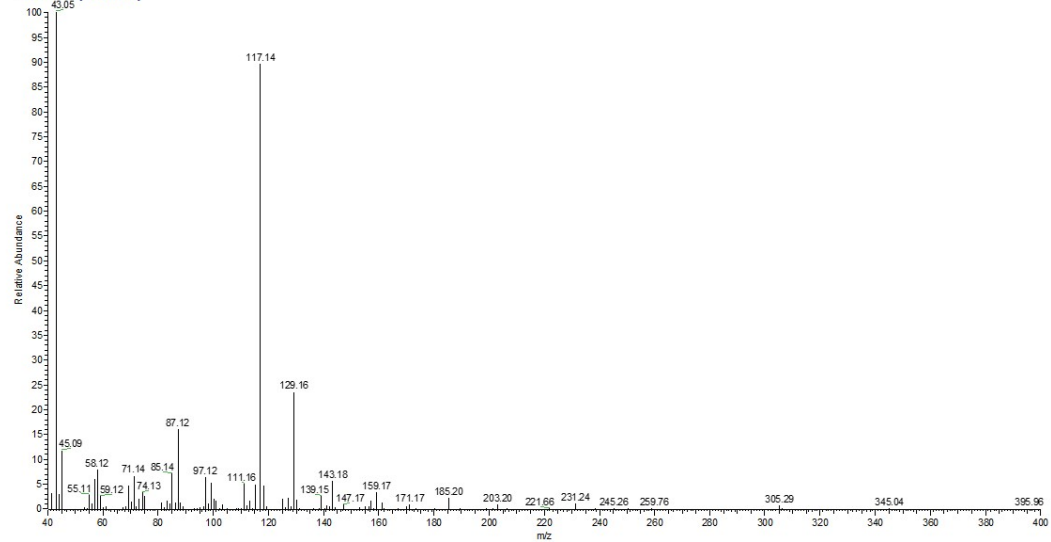**F**COP50-143951 RT: 20.05 AV: 1 NL: 1.40E6  
T: -cEiFull.ms[40.00-400.00]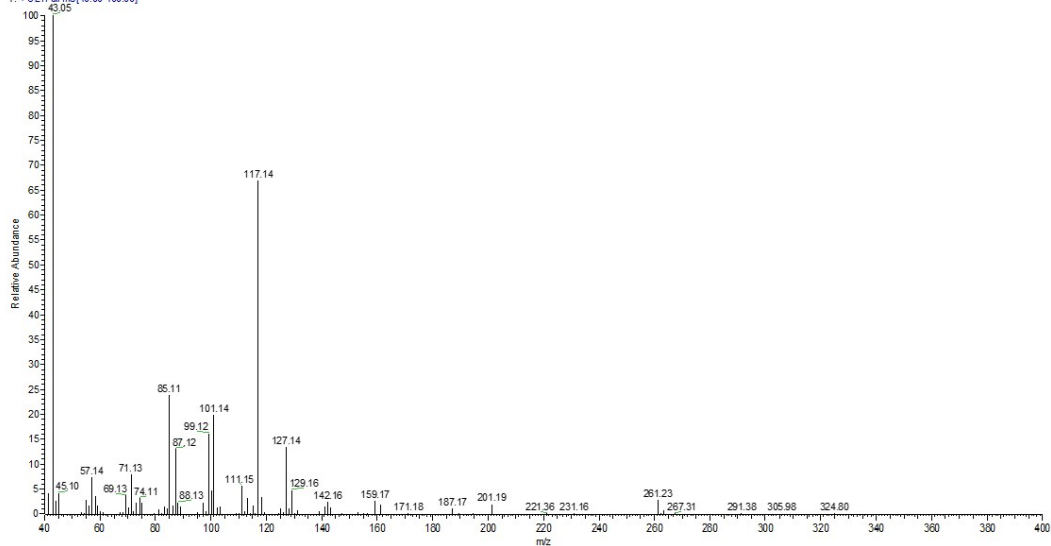

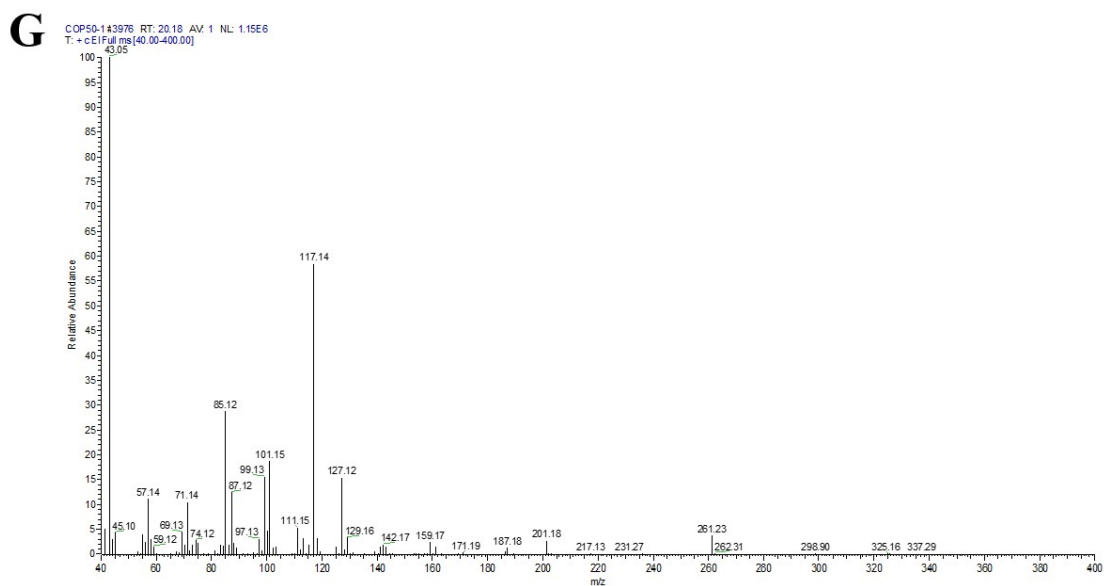

**Fig. S7 A:** The total ion chromatogram of COP50-1 derivatives.

**B:** The mass spectrum of 1,5-di-*O*-acetyl-2,3,4,6-tetra-*O*-methyl-D-glucitol.

**C:** The mass spectrum of 1,5-di-*O*-acetyl-2,3,4,6-tetra-*O*-methyl-D-galactitol.

**D:** The mass spectrum of 1,4,5-tri-*O*-acetyl-2,3,6-tri-*O*-methyl-D-glucitol.

**E:** The mass spectrum of 1,3,4,5-tetra-*O*-acetyl-2,6-di-*O*-methyl-D-glucitol.

**F:** The mass spectrum of 1,4,5,6-tetra-*O*-acetyl-2,3-di-*O*-methyl-D-glucitol.

**G:** The mass spectrum of 1,4,5,6-tetra-*O*-acetyl-2,3-di-*O*-methyl-D-mannitol.

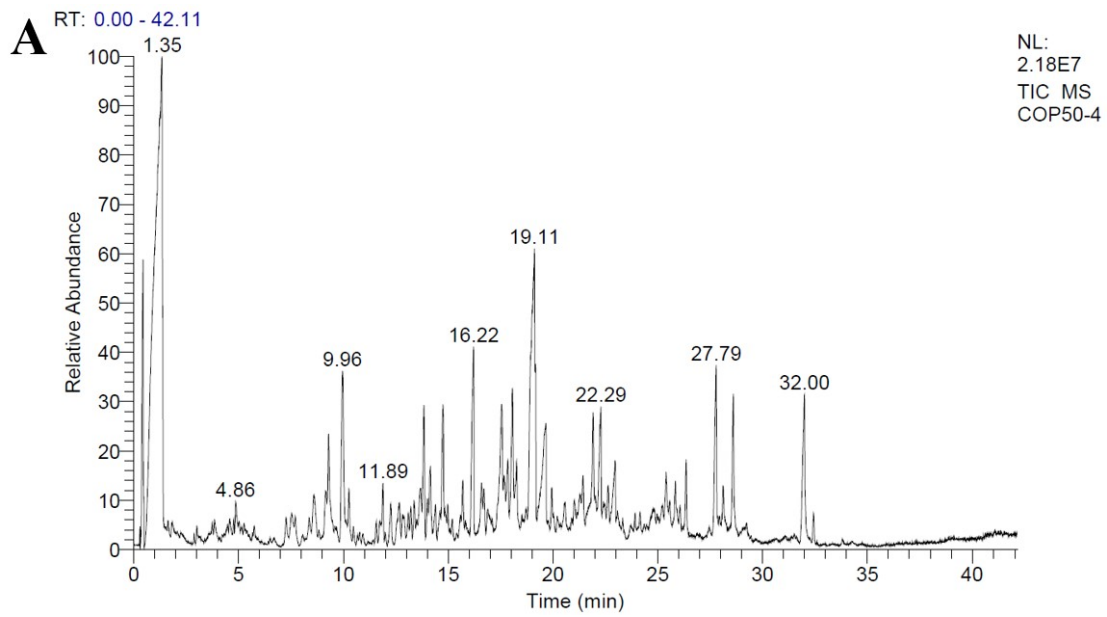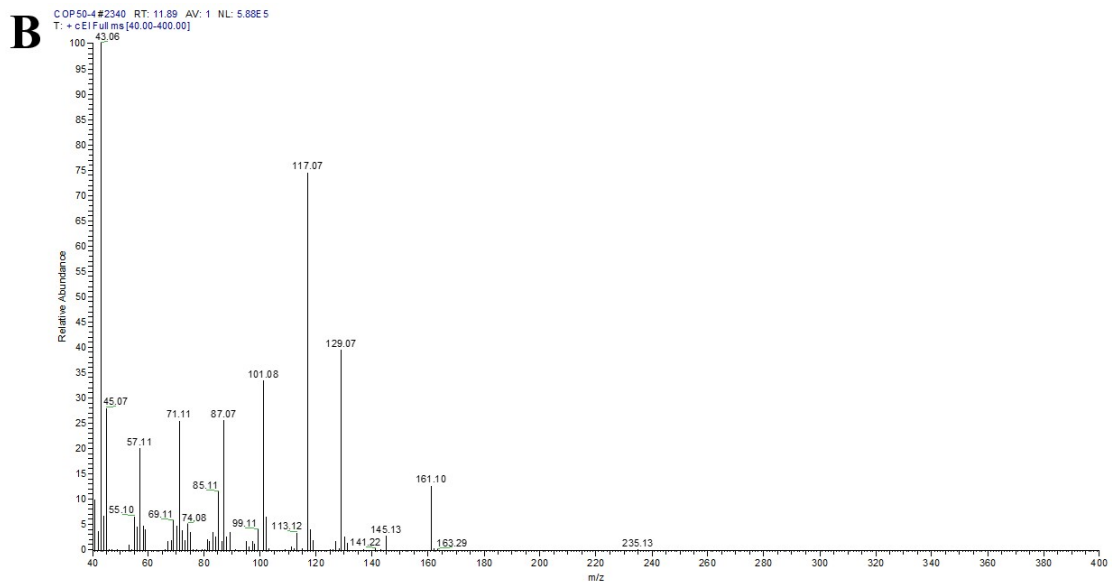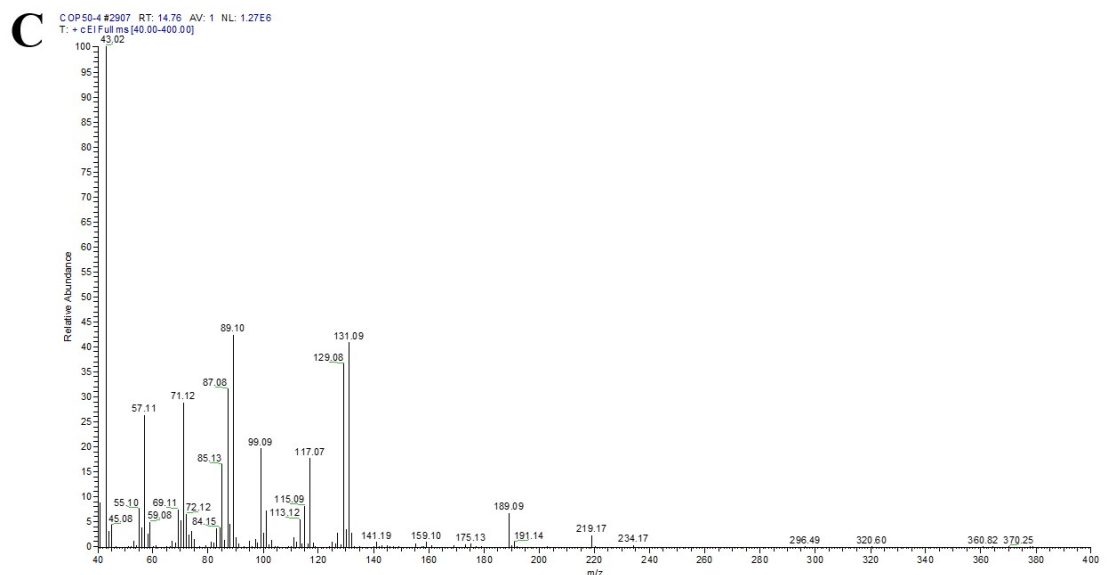

**D**COP50-4#3090 RT: 15.69 AV: 1 NL: 5.16E5  
T: + c E I Full ms [40.00-400.00]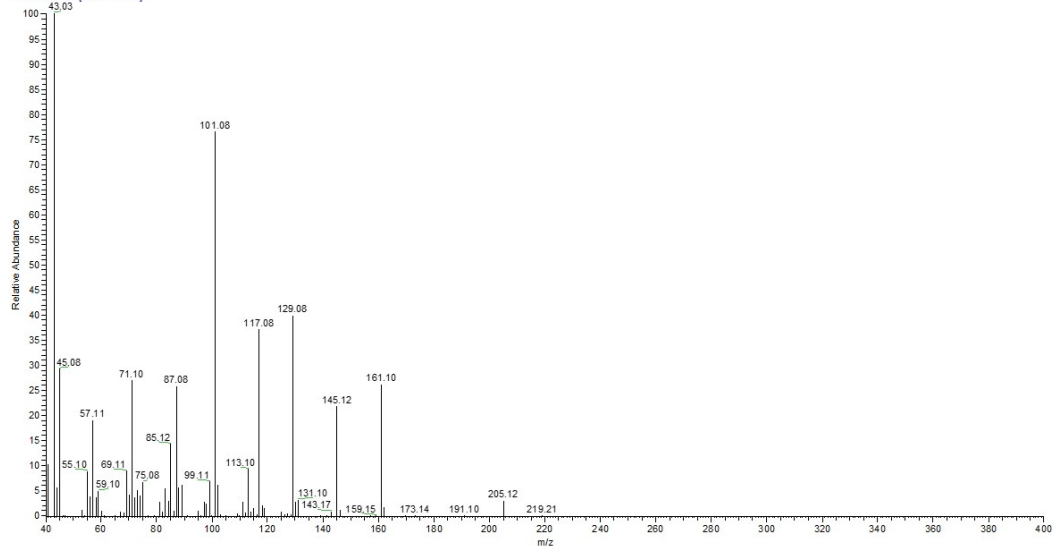**E**COP50-4#3194 RT: 16.22 AV: 1 NL: 1.53E6  
T: + c E I Full ms [40.00-400.00]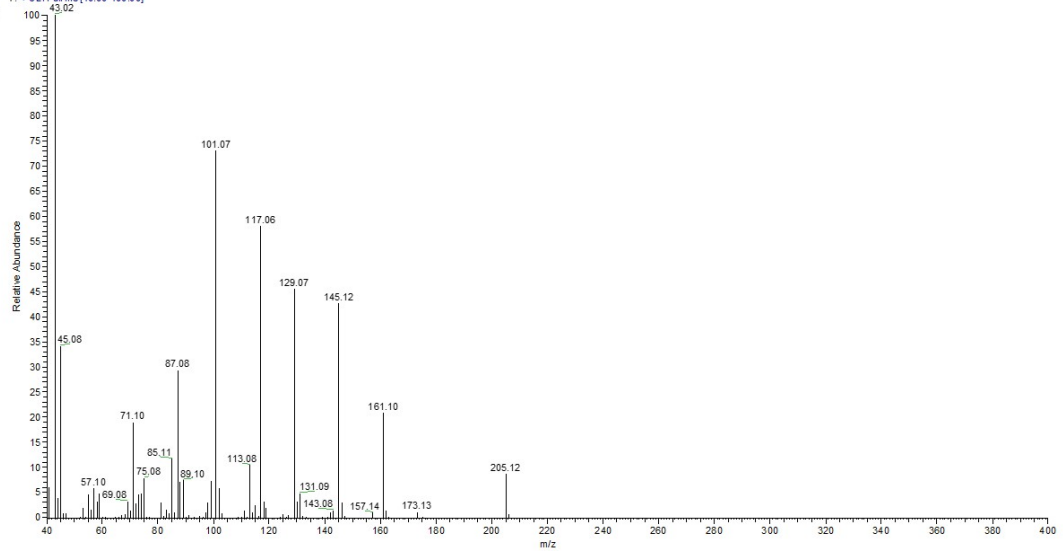**F**COP50-4#3289 RT: 16.70 AV: 1 NL: 5.17E5  
T: + c E I Full ms [40.00-400.00]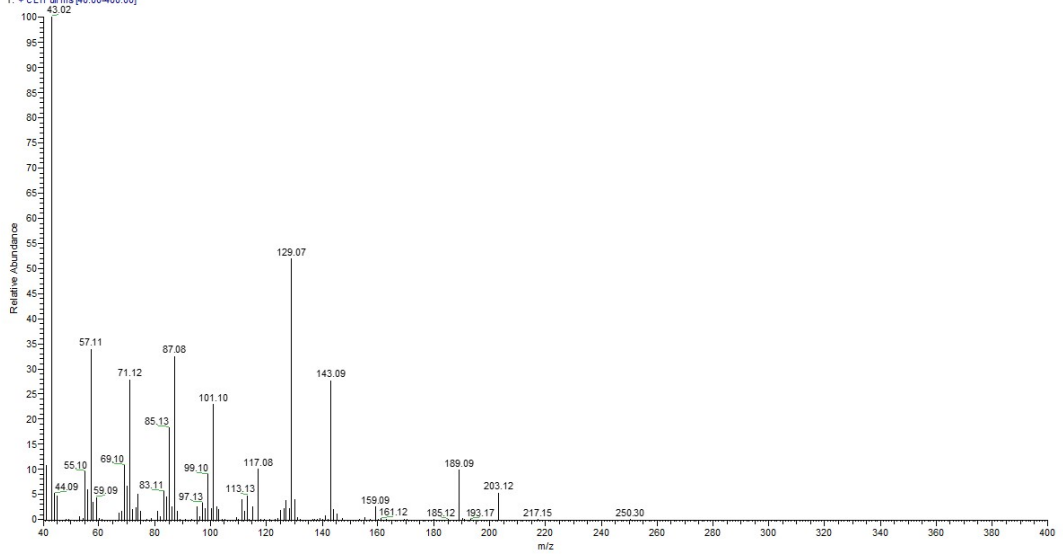



**G**COP50-4#3460 RT: 17.56 AV: 1 NL: 1.26E6  
T: + cEI Full ms [40.00-400.00]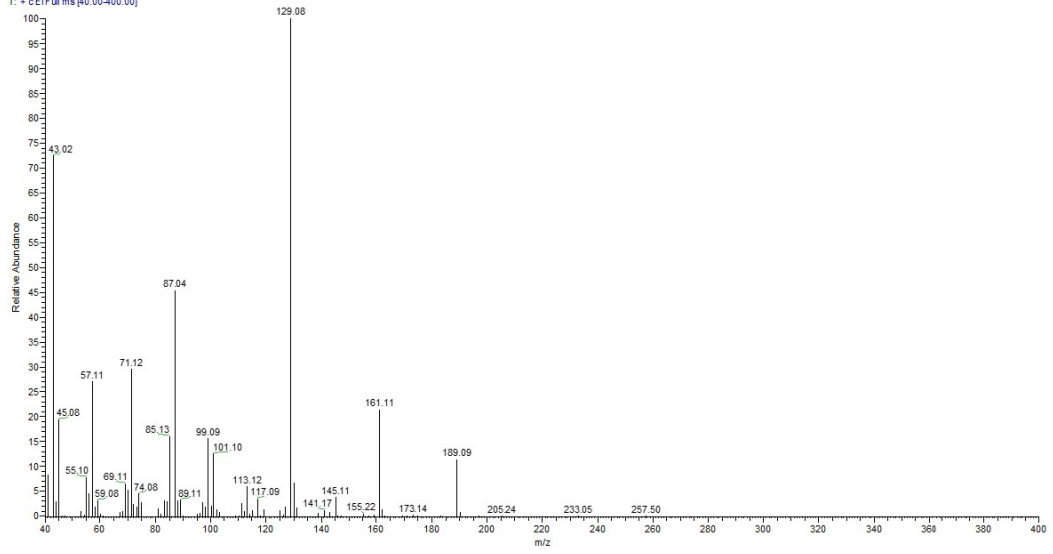**H**COP50-4#3485 RT: 17.69 AV: 1 NL: 5.68E5  
T: + cEI Full ms [40.00-400.00]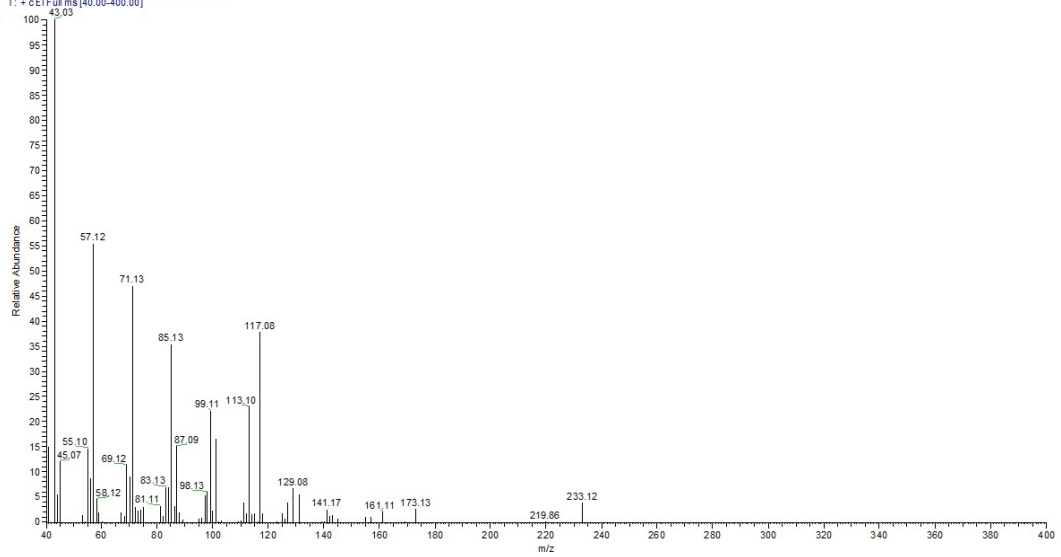**I**COP50-4#3515 RT: 17.84 AV: 1 NL: 6.77E5  
T: + cEI Full ms [40.00-400.00]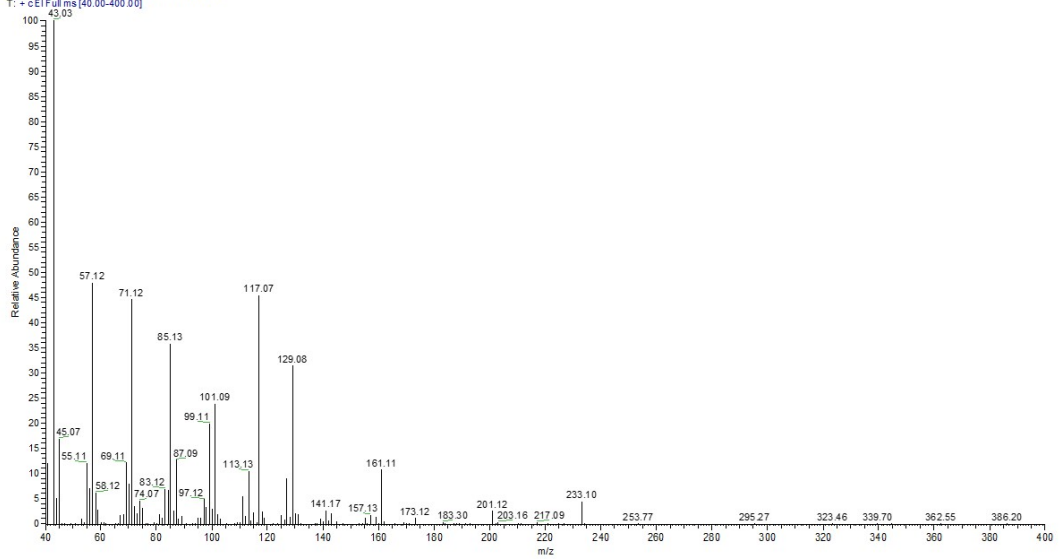

**J**COP50-4#3930 RT: 19.95 AV: 1 NL: 6.49E5  
T: + cEI Full ms [40.00-400.00]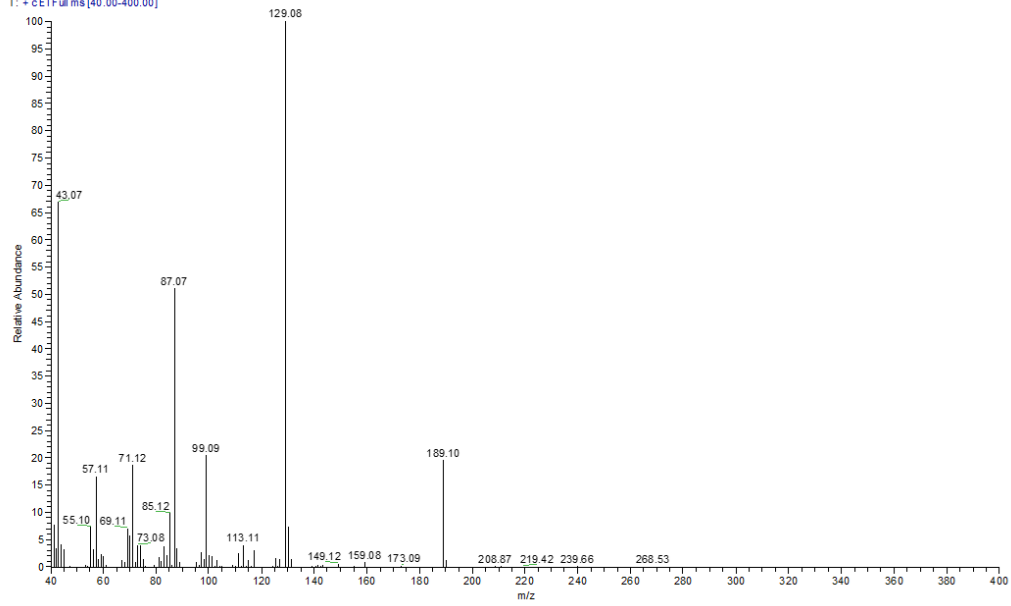**K**COP50-4#3945 RT: 20.02 AV: 1 NL: 3.71E5  
T: + cEI Full ms [40.00-400.00]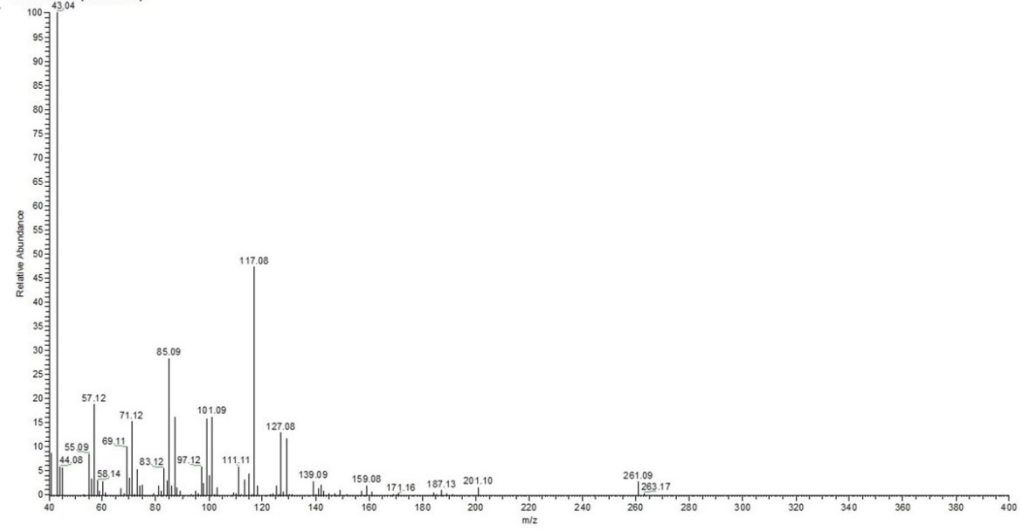**L**COP50-4#4225 RT: 21.44 AV: 1 NL: 5.90E5  
T: + cEI Full ms [40.00-400.00]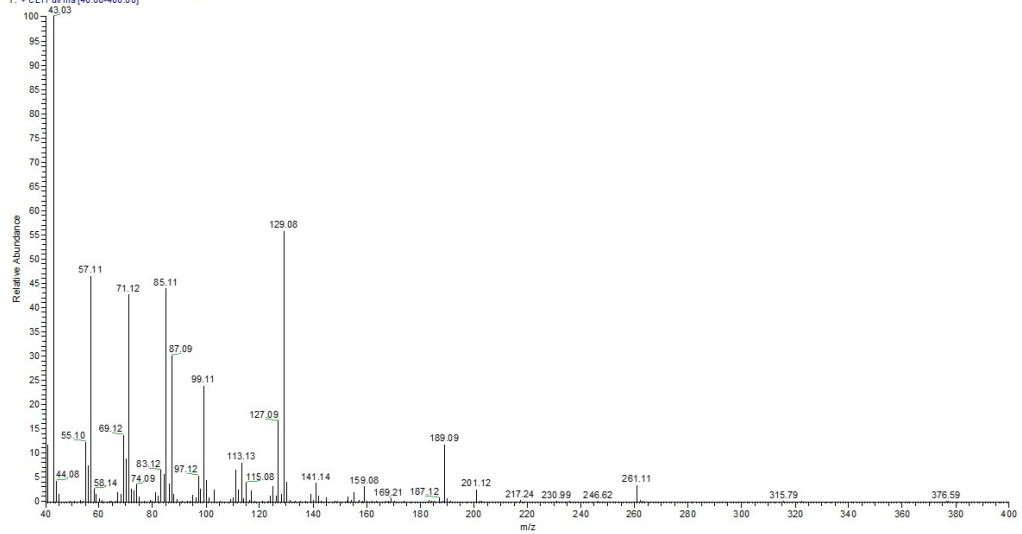

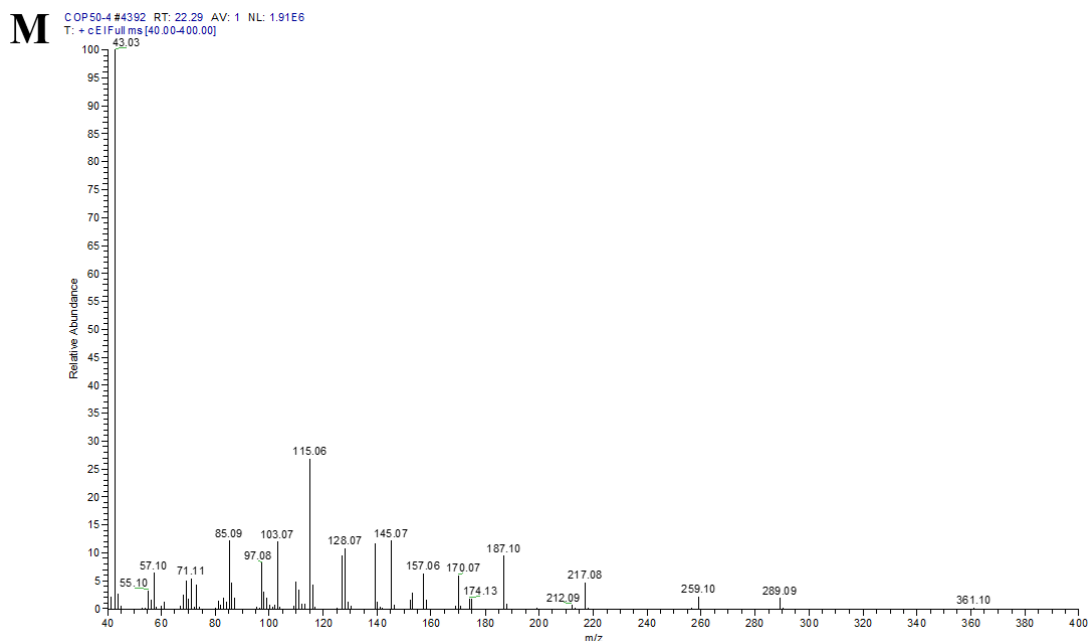

**Fig. S8 A:** The total ion chromatogram of COP50-4 derivatives.

B: The mass spectrum of 1,4-di-*O*-acetyl-2,3,5-tri-*O*-methyl-L-arabinitol.

C: The mass spectrum of 1,2,5-tri-*O*-acetyl-6-deoxy-3,4-di-*O*-methyl-L-mannitol.

D: The mass spectrum of 1,5-di-*O*-acetyl-2,3,4,6-tetra-*O*-methyl-D-mannitol.

E: The mass spectrum of 1,5-di-*O*-acetyl-2,3,4,6-tetra-*O*-methyl-D-galactitol.

F: The mass spectrum of 1,2,4,5-tetra-*O*-acetyl-6-deoxy-3-*O*-methyl-L-mannitol.

G: The mass spectrum of 1,2,5-tri-*O*-acetyl-3,4,6-tri-*O*-methyl-D-mannitol.

H: The mass spectrum of 1,4,5-tri-*O*-acetyl-2,3,6-tri-*O*-methyl-D-glucitol.

I: The mass spectrum of 1,3,5-tri-*O*-acetyl-2,4,6-tri-*O*-methyl-D-galactitol.

J: The mass spectrum of 1,2,4,5-tetra-*O*-acetyl-3-*O*-methyl-L-arabinitol.

K: The mass spectrum of 1,4,5,6-tetra-*O*-acetyl-2,3-di-*O*-methyl-D-galactitol.

L: The mass spectrum of 1,2,3,5,6-penta-*O*-acetyl-4-*O*-methyl-D-mannitol.

M: The mass spectrum of 1,2,3,4,5-penta-*O*-acetyl-L-arabinitol.

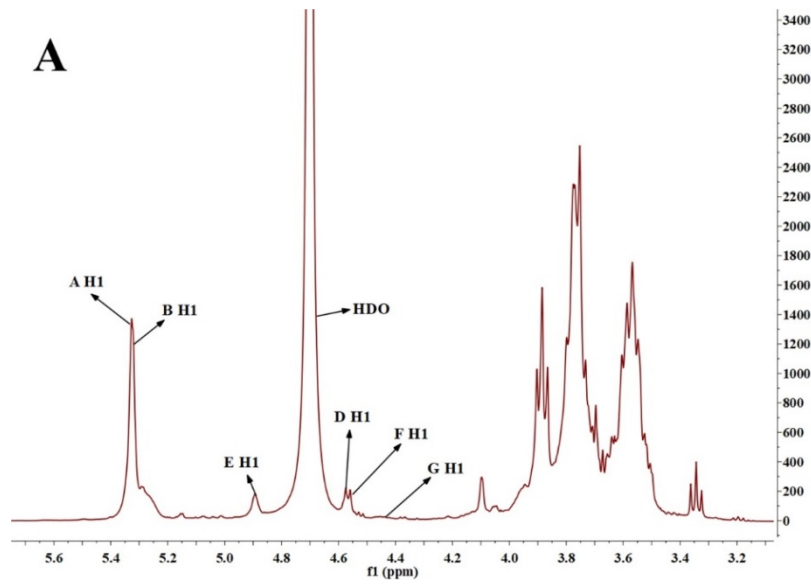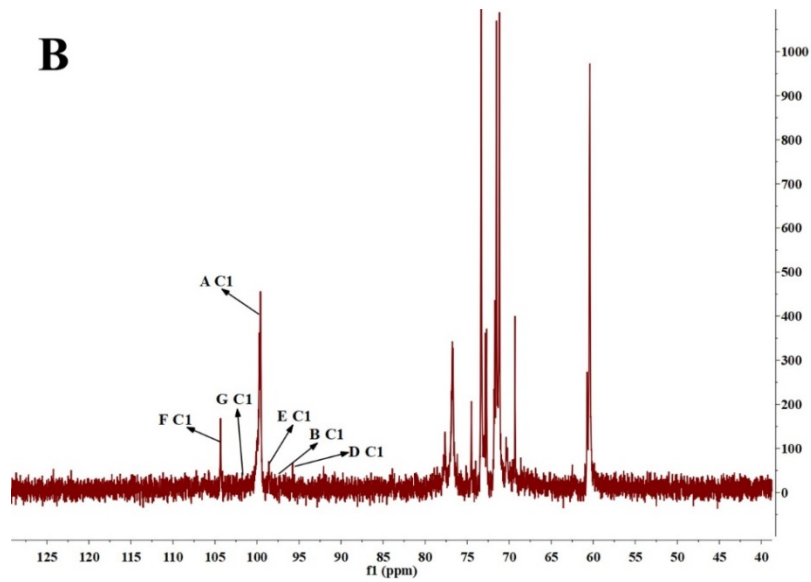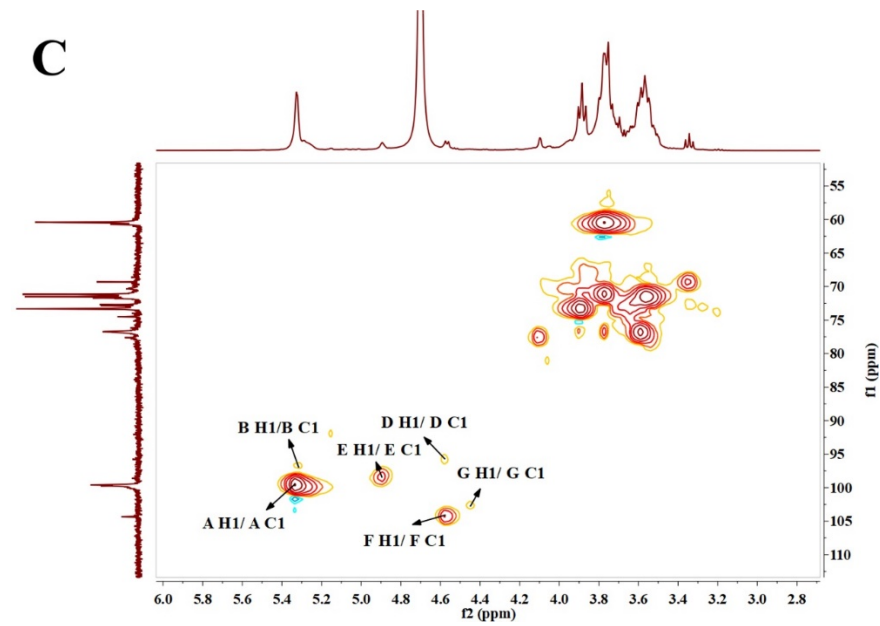

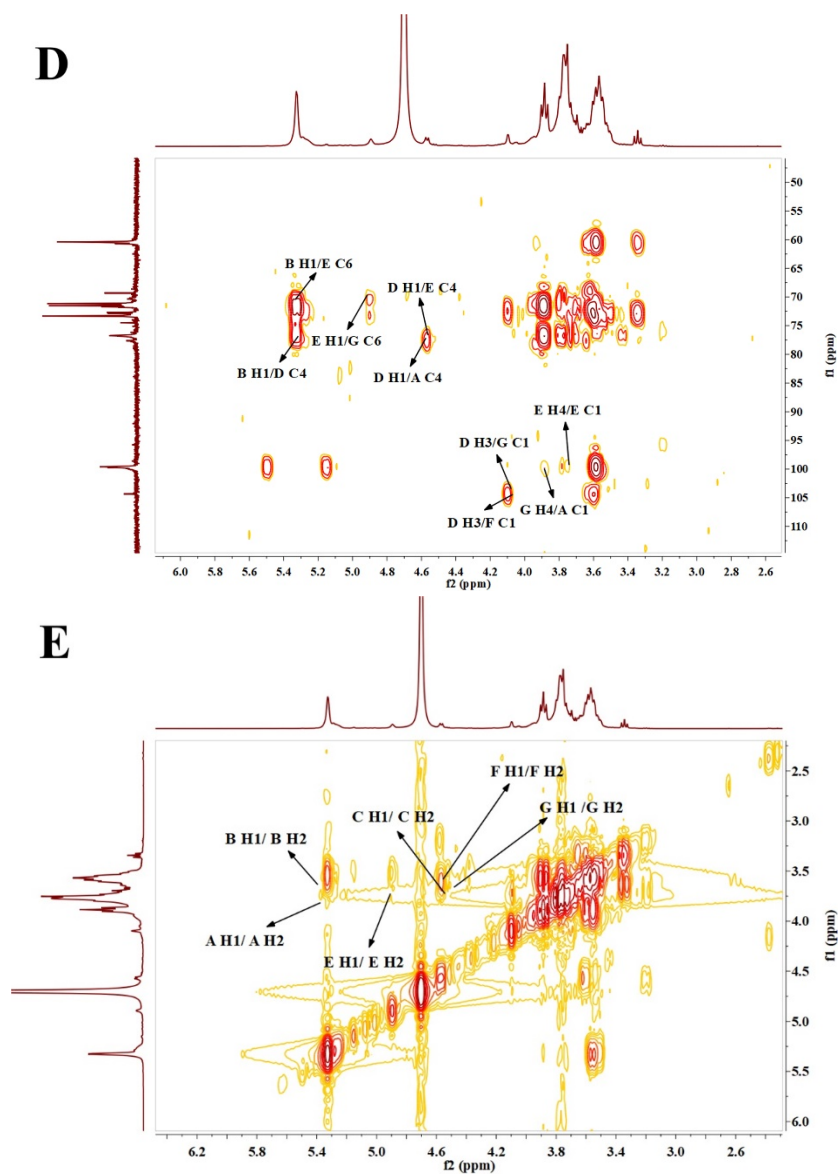

**Fig. S9** (A)  $^1\text{H}$ -NMR, (B)  $^{13}\text{C}$ -NMR, (C) HSQC, (D) HMBC, and (E)  $^1\text{H}$ - $^1\text{H}$  COSY spectra of COP50-1.

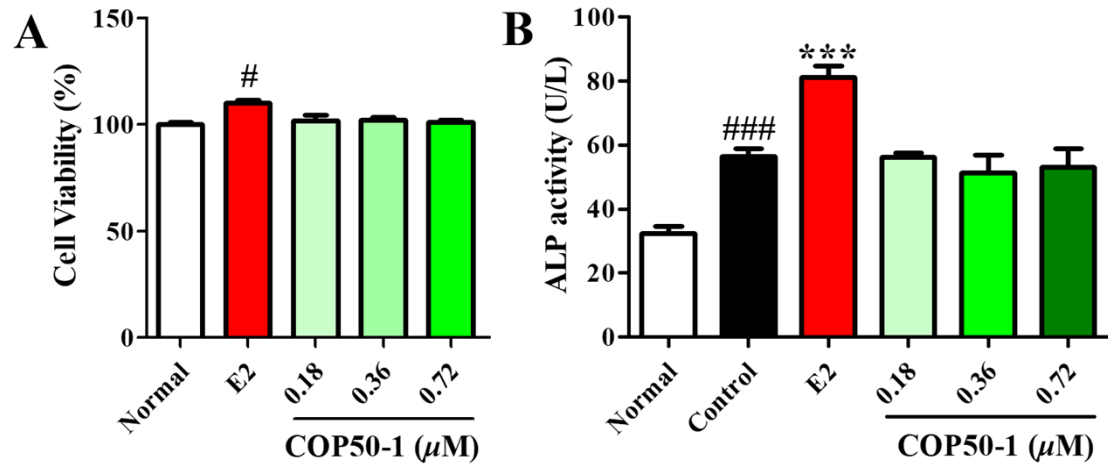

**Fig. S10** Effects of COP50-1 on the proliferation (A) and differentiation (B) of MC3T3-E1 cells. Values are mean  $\pm$  SEM. <sup>#</sup> $P < 0.05$ , <sup>###</sup> $P < 0.001$  vs. Normal. <sup>\*\*\*</sup> $P < 0.001$  vs. Control.
